# Supplementary material for: Frozen debris lobe morphology and movement: an overview of eight dynamic features, southern Brooks Range, Alaska
Source: Copernicus journal article supplement (doi:10.5194/tc-2016-1), 2016-02-09
Supplement: Supplementary file 1 [file tc-2016-1-supplement.pdf]

1 Table S1. Summary of FDL catchment size, and rock types and strengths. FDLs are listed  
 2 from the north to the south. For uniaxial compressive strength, corresponding sample  
 3 numbers shown in Figure S2 are in parentheses.

| FDL ID | Catchment area<br>(x10 <sup>3</sup> m <sup>2</sup> ) | Rock Units        | Uniaxial Compressive<br>Strength, $\sigma_c$<br>(MPa)        |
|--------|------------------------------------------------------|-------------------|--------------------------------------------------------------|
| FDL-11 | 255                                                  | Dbp, Dbcp, Ds     | 52.8, 40.3<br>(106, 107)                                     |
| FDL-7  | 742                                                  | Dwpg, Dsk, Dsc    | 26.2, 60.7<br>(102, 103)                                     |
| FDL-B  | 121                                                  | SCpm              | 77.3 (113)                                                   |
| FDL-A  | 801                                                  | SCpm, Dcsp, Egms  | 50.4 (112)                                                   |
| FDL-C  | 223                                                  | Dcsp, Egms        | ---                                                          |
| FDL-D  | 605                                                  | Op, Dim, Dls, Dsp | 34.3, 32.9, 15.2, 20.6,<br>45.8 (116, 117, 119, 121,<br>122) |
| FDL-5  | 346                                                  | Obpm, Dbcp        | 14.0 (111)                                                   |
| FDL-4  | 220                                                  | Obpm, Dbcp        | 34.6, 26.3 (108, 109)                                        |

4

5

1 Table S2. Rock units within the FDL catchments. ‘§’ indicates descriptions abbreviated from  
 2 Spangler and Hubbard (in review); ‘\*’ indicates descriptions from Dillon et al. (1988)

| Map Unit Symbol | Description                                                                                                                           |
|-----------------|---------------------------------------------------------------------------------------------------------------------------------------|
| Dbp             | § Platy, brown to black phyllite                                                                                                      |
| Dhcp            | § Platy to massive, black to green calcareous metasilstone to metasandstone                                                           |
| Dsk             | * Massive gray marble, dolomite, and carbonate conglomerate with minor polytic, quartzose, and volcanic interlayers; contains fossils |
| Dsc             | * Chlorite quartzite sandstone, conglomerate, and siltstone, limestone, and green and gray phyllite                                   |
| Dwpg            | * Tuffaceous purple and green phyllite and quartzite                                                                                  |
| Ds              | § Predominantly gray and black slate; subordinate phyllite                                                                            |
| Dls             | § Platy to massive, dark gray to brown limestone with intermittent thin, platy black phyllite                                         |
| Dsp             | § Predominantly dark gray to black and brown slate and phyllite, subordinate interbedded graphitic phyllite and thin limestone        |
| Dcsp            | § Predominantly interbedded platy, purple and green-blue chloritic schist and phyllite, subordinate black to gray phyllite            |
| Dim             | § Platy to massive, green to dark gray and black igneous and metamorphic calcium-rich rocks                                           |
| SCpm            | § Predominantly interbedded, platy, brown to dark gray-black phyllite, metasilstone, metasandstone and greywacke, subordinate shale   |
| Obpm            | * Black, carbonaceous phyllite and crinoidal metalimestone                                                                            |
| Op              | § Platy, black to gray phyllite                                                                                                       |
| Egms            | § Interbedded platy to massive, dark gray-brown to green greywacke, metasandstone and metasilstone                                    |

3

4

1 Table S3. Summary of FDL lobe and soil properties, and movement rates. FDLs are listed from the north to the south. USCS classifications  
 2 are provided for soil types. For gravimetric moisture content ( $w$ ) and organic content ( $Org$ ), the averages from four samples tested are  
 3 presented. Rates and distances are calculated from August measurements.

| FDL ID | Lobe area<br>( $\times 10^3 \text{ m}^2$ ) | Typical length<br>(m) | Typical width<br>(m) | Soil Type | $w$<br>(%) | $Org$<br>(%) | 2013-2014 Rate<br>( $\text{m yr}^{-1}$ ) | 2014-2015 Rate<br>( $\text{m yr}^{-1}$ ) | 2015 Distance to<br>Dalton Highway<br>(m) |
|--------|--------------------------------------------|-----------------------|----------------------|-----------|------------|--------------|------------------------------------------|------------------------------------------|-------------------------------------------|
| FDL-11 | 83                                         | 792                   | 117                  | GM, SM    | 17.0       | 4.8          | 0.2                                      | 0.2                                      | 233.0                                     |
| FDL-7  | 188                                        | 1109                  | 173                  | GM, SM    | 9.2        | 1.4          | 8.6                                      | 11.2                                     | N/A                                       |
| FDL-B  | 89                                         | 743                   | 157                  | SM        | 14.9       | 2.2          | 1.6                                      | 2.0                                      | 425.6                                     |
| FDL-A  | 286                                        | 1378                  | 241                  | SM        | 14.9       | 2.2          | 4.6                                      | 5.2                                      | 39.2                                      |
| FDL-C  | 210                                        | 845                   | 398                  | GM, ML    | 28.4       | 4.5          | 0.9                                      | 0.9                                      | 200.4                                     |
| FDL-D  | 144                                        | 881                   | 174                  | SM        | 23.2       | 6.2          | 14.5                                     | 13.3                                     | 414.7                                     |
| FDL-5  | 93                                         | 830                   | 120                  | SM, SP-SM | 41.2       | 7.6          | 1.9                                      | 2.4                                      | 973.7                                     |
| FDL-4  | 100                                        | 707                   | 159                  | GM, SM    | 25.1       | 5.0          | 1.0                                      | 1.2                                      | 1049.2                                    |

4

1 Table S4. FDL average movement rates calculated between data years. The beginning data  
 2 year was 1955. All rates are in  $\text{m yr}^{-1}$ . The '---' indicates lack of data for that lobe (see Table  
 3 1 for imagery limitations).

| Year | FDL-11 | FDL-7 | FDL-B | FDL-A | FDL-C | FDL-D | FDL-5 | FDL-4 |
|------|--------|-------|-------|-------|-------|-------|-------|-------|
| 1970 | 5.9    | 1.6   | 0.2   | 1.9   | 4.2   | 1.2   | 1.2   | 1.8   |
| 1978 | 9.4    | 3.0   | 2.3   | 2.2   | 1.6   | 0.5   | ---   | ---   |
| 1979 | 6.3    | 5.5   | 3.9   | ---   | ---   | ---   | ---   | ---   |
| 1981 | ---    | ---   | ---   | ---   | ---   | 2.1   | 0.0   | 0.1   |
| 1993 | 5.6    | 9.5   | 3.6   | 3.8   | 0.3   | 1.9   | 1.5   | 2.9   |
| 2007 | ---    | 6.3   | 3.4   | ---   | ---   | ---   | ---   | ---   |
| 2009 | ---    | 13.6  | 5.4   | 4.4   | 0.5   | 10.3  | 1.8   | 2.4   |
| 2011 | 0.1    | 8.4   | 1.8   | 4.2   | 0.0   | 32.1  | 7.7   | 5.0   |
| 2014 | 0.0    | 12.2  | 3.9   | 3.9   | 1.1   | 30.1  | 5.6   | 0.0   |

4  
 5

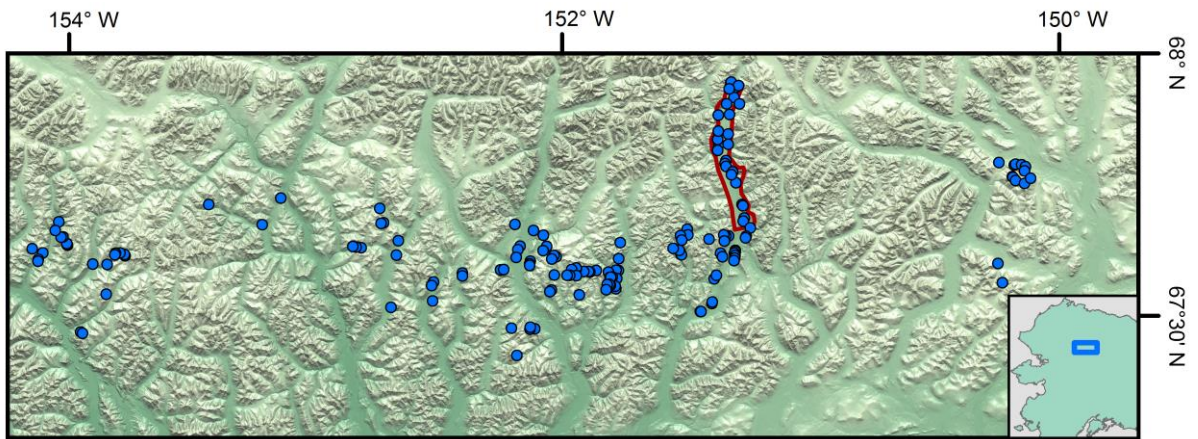

1

2 Figure S1. Location of identified FDLs (blue dots) based on analysis of available high-  
3 resolution satellite imagery. The AOI for this project is indicated by the red polygon, and the  
4 inset displays the location of the FDLs within the State of Alaska. Base map data from GINA  
5 (2015) and ASGDC (2014).

6

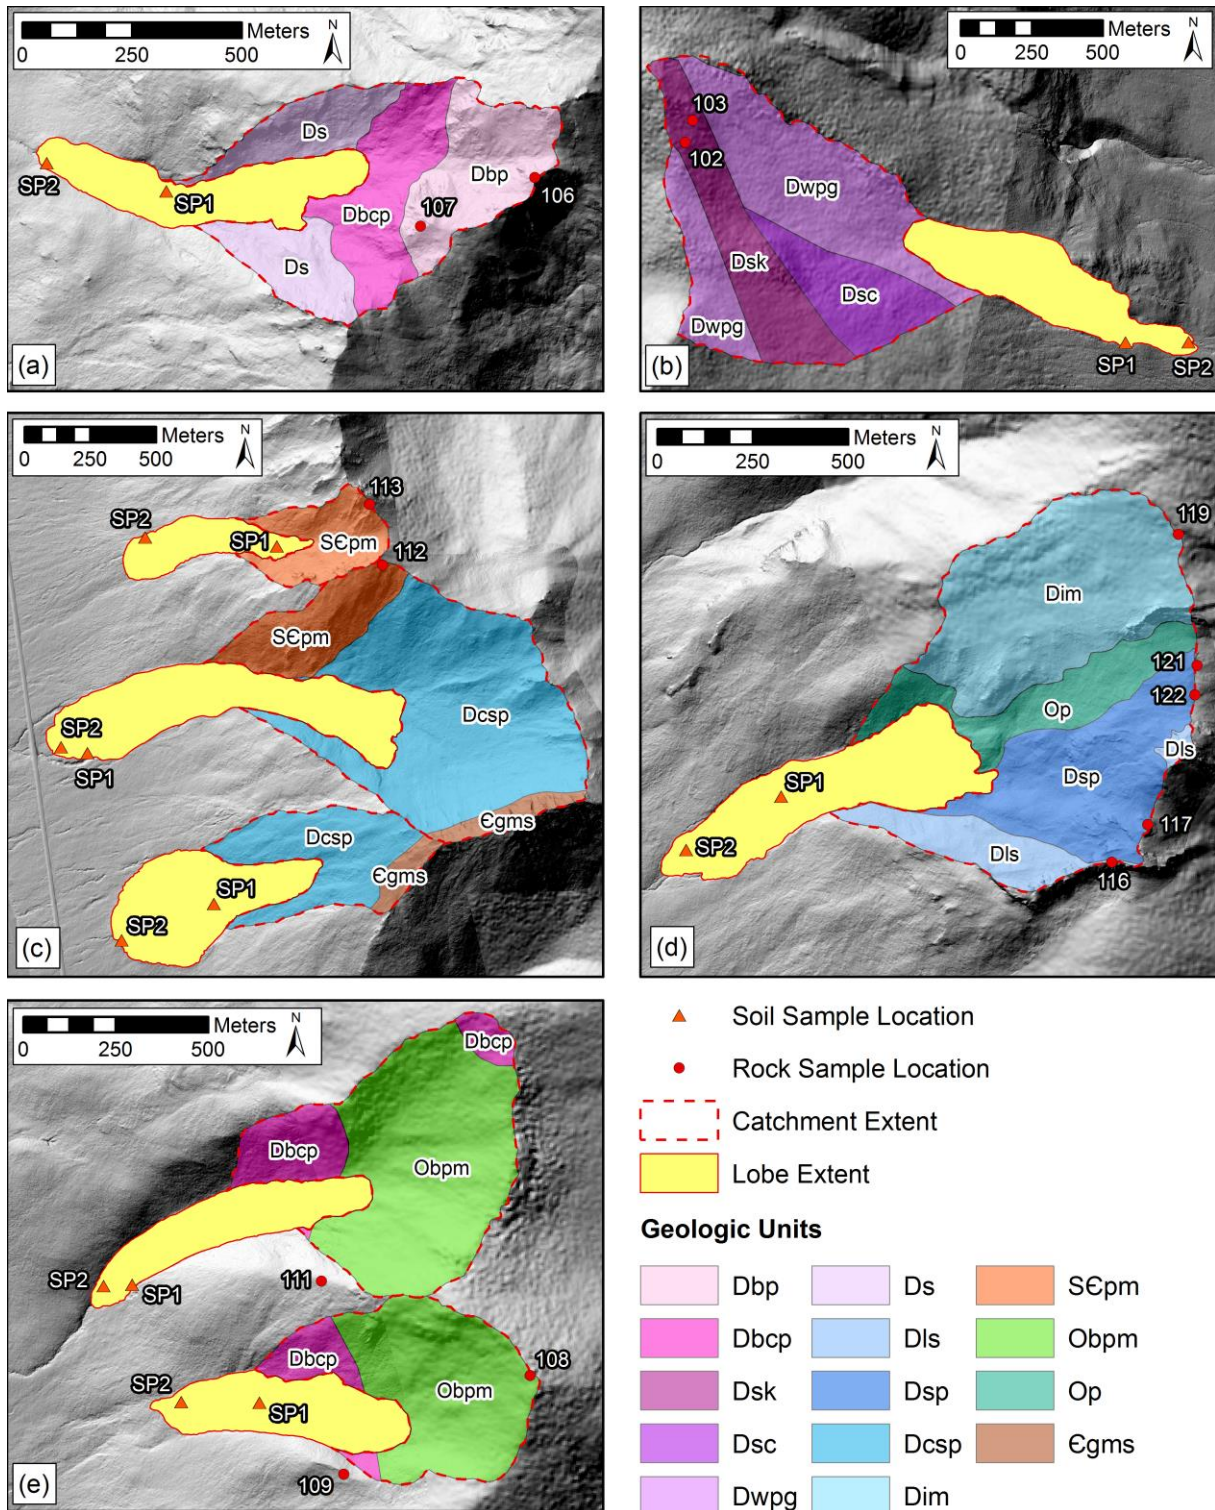

1  
 2 Figure S2. Frozen debris lobe and catchment extents, including catchment geology, and rock  
 3 and soil sample locations. From north to south: (a) FDL-11; (b) FDL-7; (c) FDL-B, FDL-A,  
 4 FDL-C; (d) FDL-D; (e) FDL-5, FDL-4. Descriptions of rock units are in Table S2.  
 5 (Geologic unit data from Spangler and Hubbard (in review) and Dillon et al. (1988). Base  
 6 map data from Hubbard et al. (2011) and GINA (2001).)
